# Supplementary material for: Plasma-assisted filling electron beam lithography for high throughput patterning of large area closed polygon nanostructures
Source: Royal Society of Chemistry journal article supplement (doi:10.1039/d0nr01032d), 2020-01-01
Supplement: d0nr01032d1.pdf [file d0nr01032d1.pdf]

## Supplementary information

### 1. Experimental method for yield analysis

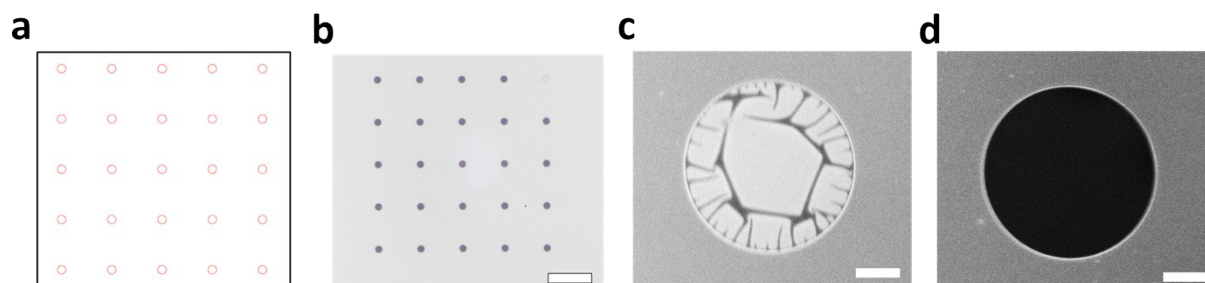

**Figure S1:** Experimental method of the yield analysis of the PFEBL. (a) Layout design for the EBL writing. (b) Optical microscope image of the test result for a given parameter set. (c) SEM image of an “incomplete” patterning with the broken membrane. (d) SEM image of a “complete” patterning with the unbroken membrane. Scale bar: (b) 100  $\mu\text{m}$ ; (c-d) 5  $\mu\text{m}$ .

## 2. Zoom-in of the residue and profiler measurement

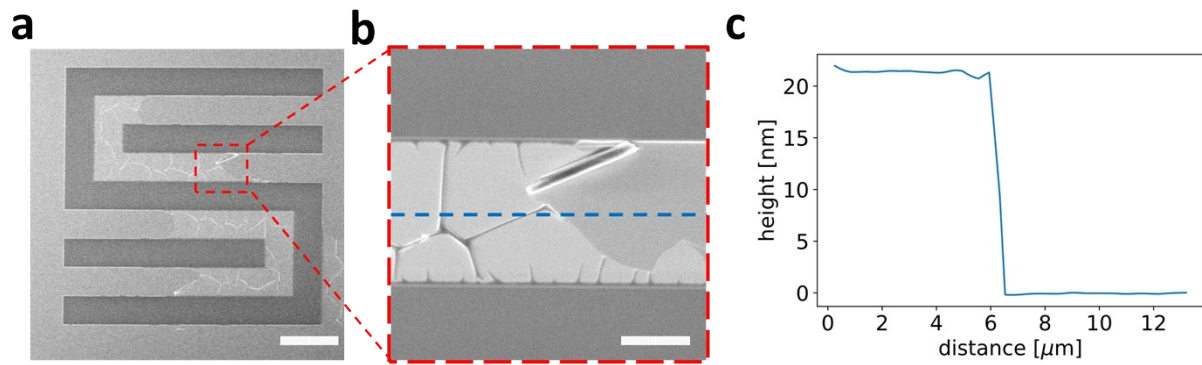

**Figure S2:** SEM image and thickness measurement of the residual layer. (a) SEM image of the “S” letter after development. (b) Enlarged SEM image the residual layer. (c) Surface profiler measurement of the thickness of the residual layer residual layer along the cyan line specified at (b). Scale bar: (a) 20  $\mu\text{m}$ ; (b) 3  $\mu\text{m}$ .

### 3. Comparison between measured thickness of the HSQ film and HSQ membrane before and after etching

**Table 1. Comparison between measured thickness of the HSQ film and HSQ membrane before and after etching**

|                                | Before RIE etching | After RIE etching |
|--------------------------------|--------------------|-------------------|
| Thickness of HSQ film (nm)     | $(96.7 \pm 1.2)$   | $(77.7 \pm 2.1)$  |
| Thickness of HSQ membrane (nm) | $(21.7 \pm 0.5)$   | 0                 |

#### 4. Strategy used for thickness measurement

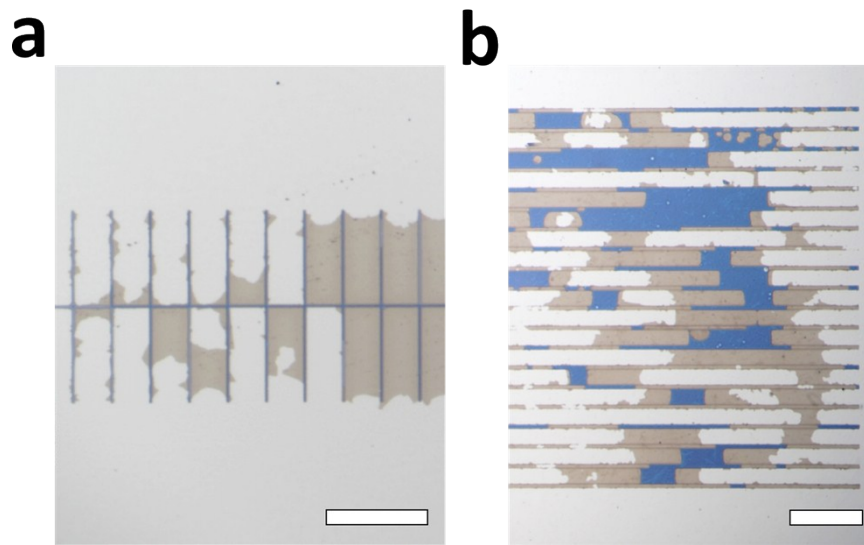

**Figure S3:** Strategy used for thickness measurement of the membrane formed during plasma treatment process. Optical microscope images of fabricated geometry using PFEBL process with a boundary width of 200 nm. (a) Fish-skeleton-like geometry with 2  $\mu\text{m}$  width fin and 2 mm spine (b) Grating geometry with the width/pitch ratio of 1/6. Scale bar: (a) 50  $\mu\text{m}$ ; (b) 250  $\mu\text{m}$ .
